# Supplementary material
Source: MDPI journal article supplement (https://www.mdpi.com/2075-4701/14/5/513)
Supplement: s1 [file s1]

### **Figures S caption**

Figure S1: The histogram of the size distribution of nanoparticles prepared on D0.

Figure S2: The histogram of the size distribution of nanoparticles prepared on D60 by extract of *R. officinalis*.

Figure S3: The histogram of the size distribution of chemically prepared nanoparticles on D60 - sample Y.

Figure S4: The histogram of the size distribution of chemically prepared nanoparticles on D60 - sample B.
