# Supplementary material
Source: MDPI journal article supplement (https://www.mdpi.com/2075-4701/14/5/513)
Supplement: s1 [file s1]

Archive with 5 entries (5 files):
- Figures Captions.pdf
- FigureS1.png
- FigureS2.png
- FigureS3.png
- FigureS4.png
