# Supplementary material
Source: MDPI journal article supplement (https://www.mdpi.com/2075-4701/14/5/513)

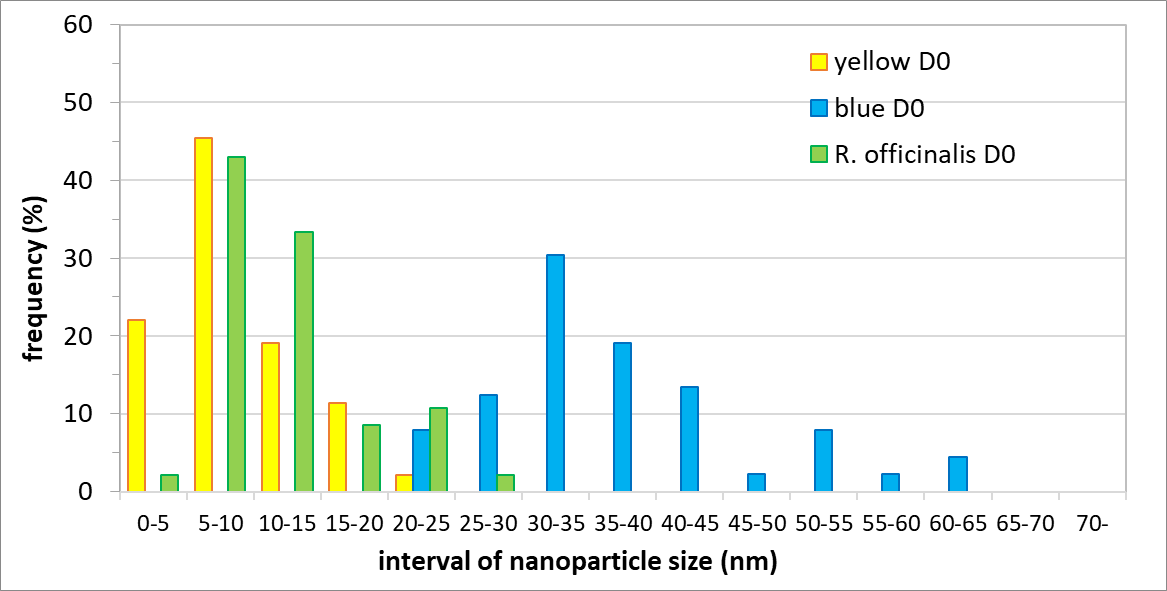

Supplement: s1 [file s1 › FigureS1.png]

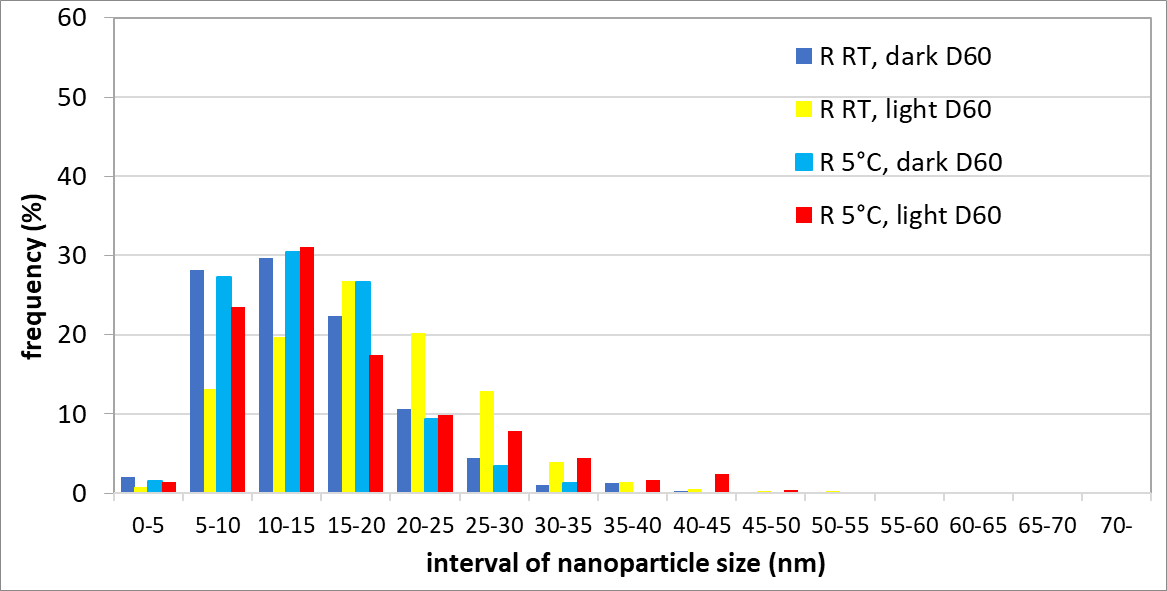

Supplement: s1 [file s1 › FigureS2.png]

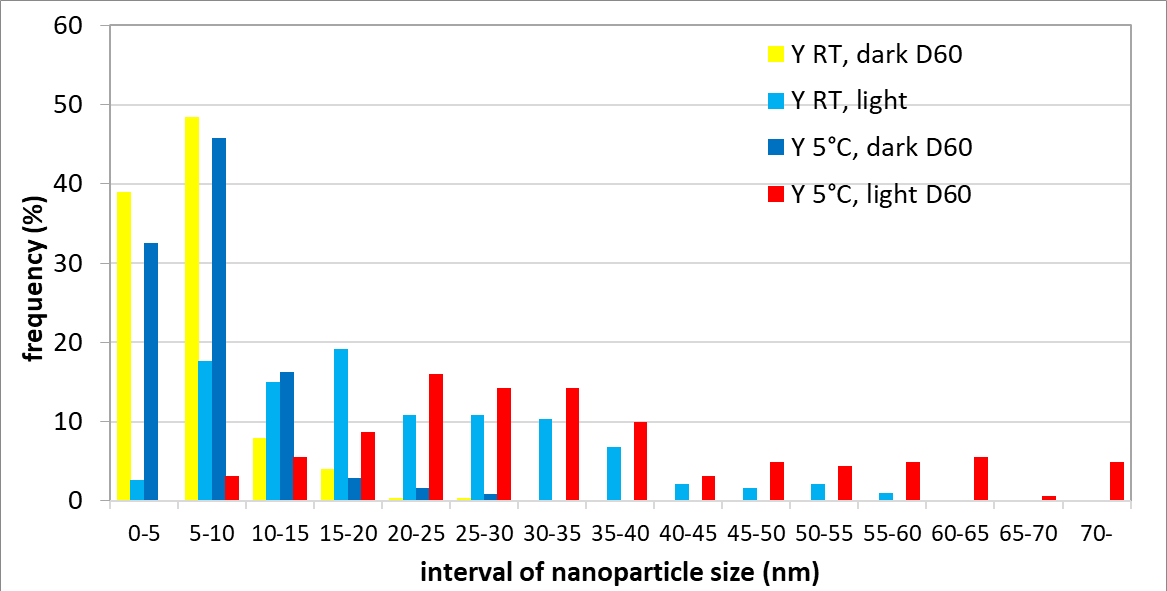

Supplement: s1 [file s1 › FigureS3.png]

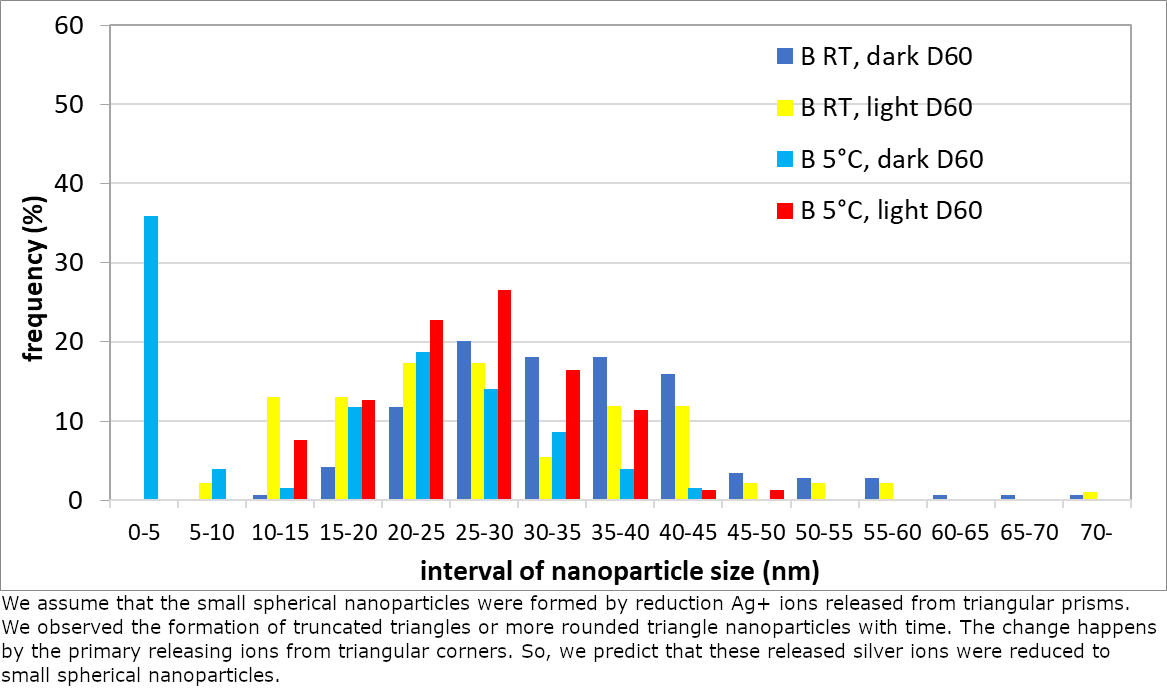

Supplement: s1 [file s1 › FigureS4.png]
